# Supplementary material for: AsHSP26.8a, a creeping bentgrass small heat shock protein integrates different signaling pathways to modulate plant abiotic stress response
Source: BMC Plant Biol. 2020 Apr 28;20:184. doi: 10.1186/s12870-020-02369-5 (PMC7189581; doi:10.1186/s12870-020-02369-5)
Supplement: Supplementary file 2 — Additional file 2: Table S2. Primers used in this study. [file 12870_2020_2369_MOESM2_ESM.xlsx]

## Sheet: E01_E02_vs_E05_E06.annotation
Table S1 List of assembled transcripts up-regulated or down-regulated (log2FC>1 or <-1, FDR<0.01) in AsHsp26.8a transgenic Arabidopsis, relative to WT plants.
#ID	FDR	log2FC	regulated	nr_annotation
AT4G25490	0.00269793	-6.79634	down	dehydration-responsive element-binding protein 1B
AT3G28899	4.47516e-13	-6.77814	down	uncharacterized protein
AT4G13395	3.20631e-18	-5.98545	down	protein rotundifolia like 12
AT3G61190	4.8044e-05	-5.92874	down	BON association protein 1
AT3G10930	7.1242e-06	-5.79379	down	uncharacterized protein
AT2G37430	0.000118757	-5.32595	down	zinc finger protein ZAT11
AT4G24570	0.00492248	-5.1236	down	dicarboxylate carrier 2
AT1G76650	1.12117e-05	-4.91827	down	calcium-binding protein CML38
AT5G59820	1.82823e-48	-4.86514	down	high light responsive zinc finger protein ZAT12
AT3G55920	1.65121e-25	-4.66369	down	Cyclophilin-like peptidyl-prolyl cis-trans isomerase family protein
AT1G73540	0.000511417	-4.61784	down	nudix hydrolase 21
AT3G29000	7.4823e-19	-4.55126	down	putative calcium-binding protein CML30
AT5G51190	7.82919e-07	-4.4923	down	ethylene-responsive transcription factor ERF105
AT1G32928	0.00166732	-4.47123	down	uncharacterized protein
AT1G07135	1.59237e-08	-4.3587	down	glycine-rich protein
AT3G28340	0.00013964	-4.20745	down	putative galacturonosyltransferase-like 10
AT3G46090	0.000765311	-4.1807	down	zinc finger protein ZAT7
AT5G44430	0.00182961	-3.94719	down	defensin-like protein
AT3G46620	0.000521341	-3.91724	down	C3H4 type zinc finger protein
AT5G46295	2.5852e-06	-3.90663	down	uncharacterized protein
AT2G22880	0.00409081	-3.88215	down	VQ motif-containing protein
AT5G22520	8.4849e-09	-3.80626	down	uncharacterized protein
AT3G44260	1.61139e-77	-3.75609	down	putative CCR4-associated factor 1
AT1G27730	2.62747e-76	-3.7419	down	zinc finger protein STZ/ZAT10
AT1G76600	0.0098253	-3.72679	down	uncharacterized protein
AT1G67856	0.000309018	-3.60758	down	RING/U-box domain-containing protein
AT1G35210	1.76198e-16	-3.49805	down	uncharacterized protein
AT2G40000	6.65366e-05	-3.46908	down	HS1 PRO-1 2-like protein
AT5G28610	5.01991e-07	-3.42774	down	uncharacterized protein
AT1G77640	1.5536e-08	-3.40605	down	ethylene-responsive transcription factor ERF013
AT2G26010	2.93931e-18	-3.39011	down	plant defensin 1.3
AT4G27280	9.77734e-55	-3.3708	down	EF-hand, calcium binding motif-containing protein
AT5G22250	0.00182961	-3.31873	down	CCR4-associated factor 1B
AT1G29290	7.44745e-05	-3.26725	down	uncharacterized protein
AT1G66400	2.91333e-16	-3.17148	down	calmodulin like 23
AT5G67450	2.10094e-11	-3.05553	down	zinc-finger protein 1
AT5G44420	6.07027e-06	-3.04462	down	ethylene- and jasmonate-responsive plant defensin
AT1G32920	3.98071e-39	-2.96487	down	uncharacterized protein
AT1G19020	1.90405e-07	-2.9585	down	uncharacterized protein
AT5G12880	0.00608456	-2.9583	down	proline-rich family protein
AT2G01300	2.62547e-14	-2.9364	down	uncharacterized protein
AT3G57450	7.93084e-10	-2.91588	down	uncharacterized protein
AT4G27657	6.04217e-05	-2.90761	down	uncharacterized protein
AT4G04540	0.000818404	-2.83122	down	putative cysteine-rich receptor-like protein kinase 39
AT1G05575	9.49301e-17	-2.7814	down	uncharacterized protein
AT3G10815	0.00619125	-2.76424	down	RING/U-box domain-containing protein
AT5G65300	1.0503e-20	-2.74908	down	uncharacterized protein
AT3G52450	7.2291e-11	-2.74716	down	E3 ubiquitin-protein ligase PUB22
AT2G32030	5.41389e-06	-2.70457	down	GCN5-related N-acetyltransferase-like protein
AT3G50060	2.45592e-13	-2.69764	down	myb domain protein 77
AT5G05300	3.05756e-06	-2.66881	down	uncharacterized protein
AT5G18840	2.09256e-05	-2.65615	down	sugar transporter ERD6-like 16
AT1G21110	1.88539e-06	-2.6445	down	O-methyltransferase family protein
AT5G44350	4.27759e-05	-2.63083	down	ethylene-responsive nuclear protein -like protein
AT5G63130	1.56367e-11	-2.5712	down	octicosapeptide/Phox/Bem1p domain-containing protein
AT5G37770	2.53313e-07	-2.55261	down	calcium-binding protein CML24
AT1G66500	4.84436e-10	-2.53694	down	Pre-mRNA cleavage complex II
AT5G09800	1.59237e-08	-2.53008	down	ARM repeat superfamily protein
AT4G23610	0.00281979	-2.52418	down	late embryogenesis abundant hydroxyproline-rich glycoprotein
AT1G56660	0.00302713	-2.52288	down	uncharacterized protein
AT5G61600	0.000623384	-2.52122	down	ethylene-responsive transcription factor ERF104
AT5G43620	1.44737e-12	-2.51921	down	Pre-mRNA cleavage complex II
AT5G54490	2.23884e-05	-2.49831	down	pinoid-binding protein 1
AT1G72920	1.53584e-07	-2.49679	down	Toll-Interleukin-Resistance domain-containing protein
AT5G47230	9.43375e-09	-2.48713	down	ethylene-responsive transcription factor 5
AT1G15010	2.39733e-05	-2.46542	down	uncharacterized protein
AT3G19030	9.30766e-05	-2.45974	down	uncharacterized protein
AT1G36622	0.000969911	-2.44618	down	uncharacterized protein
AT4G22710	0.00102476	-2.44167	down	cytochrome P450, family 706, subfamily A, polypeptide 2
AT3G28510	0.00765013	-2.41817	down	AAA-type ATPase family protein
AT3G30720	5.7563e-11	-2.41335	down	qua-quine starch
AT3G50800	0.0059348	-2.4048	down	uncharacterized protein
AT2G30040	0.00319651	-2.37896	down	mitogen-activated protein kinase kinase kinase 14
AT3G48630	0.00845796	-2.36691	down	uncharacterized protein
AT2G27660	2.9972e-16	-2.36385	down	cysteine/histidine-rich C1 domain-containing protein
AT1G56250	0.00154193	-2.33006	down	F-box protein PP2-B14
AT5G04340	1.83607e-31	-2.27892	down	zinc finger protein ZAT6
AT1G25400	2.53245e-07	-2.27483	down	uncharacterized protein
AT5G53290	0.000195433	-2.27236	down	ethylene-responsive transcription factor CRF3
AT5G06320	1.4679e-06	-2.26955	down	NDR1/HIN1-Like protein 3
AT2G42350	0.000318555	-2.22387	down	RING-H2 finger protein
AT5G52750	0.00181285	-2.22283	down	heavy metal transport/detoxification domain-containing protein
AT4G28085	1.1574e-11	-2.20361	down	uncharacterized protein
AT2G26530	5.11329e-25	-2.20092	down	uncharacterized protein
AT1G72910	2.86544e-19	-2.19232	down	Toll-Interleukin-Resistance domain-containing protein
AT5G22545	0.00027348	-2.18152	down	uncharacterized protein
AT3G56880	1.99756e-07	-2.15703	down	VQ motif-containing protein
AT2G19190	1.03565e-06	-2.15508	down	FLG22-induced receptor-like kinase 1
AT1G73010	9.05175e-06	-2.14976	down	inorganic pyrophosphatase 1
AT3G26830	0.00435932	-2.13911	down	bifunctional dihydrocamalexate synthase/camalexin synthase
AT3G15210	3.36876e-05	-2.12423	down	ethylene-responsive transcription factor 4
AT5G22540	0.00022793	-2.08495	down	uncharacterized protein
AT5G63160	0.00055232	-2.07894	down	BTB and TAZ domain protein 1
AT2G35710	1.15509e-06	-2.07455	down	plant glycogenin-like starch initiation protein 7
AT5G62480	1.24597e-09	-2.05458	down	glutathione S-transferase tau 9
AT2G25735	2.70264e-11	-2.04438	down	uncharacterized protein
AT3G50260	4.41186e-13	-2.02653	down	ethylene-responsive transcription factor ERF011
AT1G67980	0.000373263	-2.02352	down	caffeoyl-CoA 3-O-methyltransferase
AT5G39670	5.95181e-05	-2.0192	down	putative calcium-binding protein CML45
AT3G20600	3.49647e-05	-1.96691	down	protein NDR1
AT1G21326	0.00378174	-1.95079	down	VQ motif-containing protein
AT5G38710	4.39816e-08	-1.94885	down	proline dehydrogenase 2
AT4G24110	0.00654013	-1.91507	down	uncharacterized protein
AT2G18690	9.62898e-07	-1.91207	down	uncharacterized protein
AT1G66700	0.000296703	-1.89912	down	SABATH family methyltransferase PXMT1
AT2G04495	1.23313e-13	-1.8863	down	uncharacterized protein
AT2G35290	0.000807069	-1.88586	down	uncharacterized protein
AT2G28400	4.19654e-10	-1.8801	down	uncharacterized protein
AT2G38790	0.00483008	-1.86776	down	uncharacterized protein
AT1G22190	7.45142e-19	-1.809	down	ethylene-responsive transcription factor ERF058
AT4G35180	4.73572e-12	-1.79211	down	LYS/HIS transporter 7
AT5G02780	0.000818404	-1.78417	down	glutathione transferase lambda 1
AT3G28850	0.000248934	-1.75457	down	Glutaredoxin-like protein
AT1G21120	0.000578085	-1.75047	down	O-methyltransferase family protein
AT3G56710	0.000222438	-1.74871	down	sigma factor binding protein 1
AT1G51890	0.000149581	-1.72842	down	probable LRR receptor-like protein kinase
AT1G21100	3.69899e-05	-1.72481	down	indole glucosinolate o-methyltransferase 1
AT3G04300	0.000648526	-1.71564	down	RmlC-like cupins superfamily protein
AT1G26420	3.97216e-05	-1.69136	down	FAD-binding and BBE domain-containing protein
ATCG00730	0.00576664	-1.68369	down	cytochrome b6/f complex subunit IV
AT3G48100	0.00467162	-1.68082	down	two-component response regulator ARR5
AT3G24520	5.39371e-05	-1.67859	down	heat stress transcription factor C-1
AT1G59590	0.000439922	-1.66933	down	protein ZCF37
AT5G23360	0.00976728	-1.65498	down	GRAM domain-containing protein / ABA-responsive-related protein
AT1G49000	7.02863e-09	-1.65235	down	uncharacterized protein
AT1G25550	2.15448e-09	-1.63198	down	myb-like transcription factor-like protein
AT5G44060	5.92144e-05	-1.6291	down	uncharacterized protein
AT3G59880	0.00912464	-1.61875	down	uncharacterized protein
AT1G47890	1.87004e-06	-1.61704	down	receptor like protein 7
AT1G14870	9.12538e-07	-1.61217	down	cadmium resistance protein 2
AT1G66180	0.00209023	-1.6082	down	aspartyl protease family protein
AT5G01540	0.00107248	-1.60153	down	lectin receptor kinase A4.1
AT5G47960	0.000439922	-1.59812	down	RAB GTPase homolog A4C
AT5G25250	2.89962e-15	-1.58825	down	Flotillin-like protein 1
AT2G27690	6.4639e-10	-1.56224	down	cytochrome P450, family 94, subfamily C, polypeptide 1
AT3G52800	3.19012e-12	-1.56198	down	zinc finger A20 and AN1 domain-containing stress-associated protein 6
AT1G72900	1.10977e-05	-1.53072	down	Toll-Interleukin-Resistance domain-containing protein
AT2G20142	0.000214584	-1.53013	down	Toll-Interleukin-Resistance domain-containing protein
AT3G12830	3.88739e-08	-1.52331	down	SAUR-like auxin-responsive protein
AT1G12420	8.22528e-10	-1.52071	down	ACT domain repeat 8 protein
AT1G65690	2.14804e-05	-1.51439	down	late embryogenesis abundant (LEA) hydroxyproline-rich glycoprotein
AT1G80440	8.4849e-09	-1.50995	down	F-box/kelch-repeat protein
AT5G11070	8.51832e-14	-1.50846	down	uncharacterized protein
AT1G51800	1.23313e-13	-1.50675	down	putative leucine-rich repeat protein kinase
AT2G24550	5.92364e-11	-1.50285	down	uncharacterized protein
AT5G62020	6.33216e-07	-1.49989	down	heat stress transcription factor B-2a
AT3G25600	1.88136e-07	-1.49866	down	putative calcium-binding protein CML16
AT5G53750	0.00244941	-1.48295	down	CBS domain-containing protein
AT1G27100	0.000106169	-1.48271	down	Actin cross-linking protein
AT2G02930	0.00189716	-1.47819	down	glutathione S-transferase F3
AT4G17615	2.8827e-07	-1.47378	down	calcineurin B-like protein 1
AT5G16360	0.000122472	-1.46285	down	putative lecithin retinol acyltransferase-like protein
AT4G11000	3.89387e-06	-1.4554	down	ankyrin repeat-containing protein
AT1G09070	5.2368e-13	-1.44669	down	uncharacterized protein
AT5G38900	0.000107416	-1.4439	down	Thioredoxin superfamily protein
AT5G57220	1.12502e-05	-1.42815	down	cytochrome P450, family 81, subfamily F, polypeptide 2
AT4G23190	2.18525e-08	-1.42753	down	cysteine-rich receptor-like protein kinase 11
AT5G56980	5.97779e-11	-1.42315	down	uncharacterized protein
AT4G35985	1.39903e-07	-1.42257	down	senescence/dehydration-associated protein
AT3G02800	0.00128911	-1.42194	down	atypical dual-specificity phosphatase
AT5G02020	3.31356e-05	-1.41749	down	uncharacterized protein
AT2G24850	0.00162695	-1.41151	down	tyrosine aminotransferase 3
AT5G28630	3.01241e-07	-1.40879	down	glycine-rich protein
AT5G49480	4.19654e-10	-1.40708	down	Ca2+-binding protein 1
AT4G16780	8.62902e-05	-1.39843	down	homeobox protein 2
AT5G67300	9.28295e-07	-1.39326	down	transcription factor MYB44
AT1G77760	0.000210934	-1.38478	down	nitrate reductase [NADH]
AT5G26030	2.58969e-07	-1.37977	down	ferrochelatase 1
AT3G09940	0.00304868	-1.37566	down	monodehydroascorbate reductase (NADH)
AT3G11650	3.17393e-05	-1.37087	down	NDR1/HIN1-Like protein 2
AT1G67470	2.63274e-05	-1.36687	down	inactive serine/threonine-protein kinase
AT3G09020	0.00584505	-1.36671	down	alpha 1,4-glycosyltransferase family protein
AT1G02660	9.09732e-10	-1.36562	down	alpha/beta-Hydrolases superfamily protein
AT5G26340	2.9429e-09	-1.36554	down	sugar transport protein 13
AT5G43420	4.57876e-05	-1.36278	down	RING-H2 finger protein
AT4G37260	4.14264e-08	-1.35191	down	myb domain protein 73
AT3G52520	0.000541669	-1.34796	down	uncharacterized protein
AT1G28190	1.56113e-06	-1.33514	down	uncharacterized protein
AT2G41510	0.00291286	-1.31807	down	cytokinin dehydrogenase 1
AT5G48657	2.66611e-08	-1.31274	down	defense protein-like protein
AT1G18570	5.39371e-05	-1.30523	down	myb domain protein 51
AT1G69890	0.00131247	-1.27852	down	uncharacterized protein
AT3G29034	0.000453534	-1.27583	down	uncharacterized protein
AT1G33610	1.20424e-06	-1.27521	down	leucine-rich repeat (LRR) family protein
AT3G54020	2.81242e-09	-1.27461	down	phosphatidylinositol:ceramide inositolphosphotransferase 1
AT4G11290	0.000100477	-1.2734	down	peroxidase 39
AT4G20830	3.31356e-05	-1.26709	down	FAD-binding Berberine family protein
AT4G02380	0.000114877	-1.2669	down	senescence-associated protein
AT4G11521	0.00119754	-1.2642	down	putative cysteine-rich receptor-like protein kinase 34
AT1G69490	2.17908e-06	-1.26287	down	NAC transcription factor protein family
AT1G02920	3.43457e-10	-1.26227	down	glutathione S-transferase 7/11
AT4G36500	3.76318e-10	-1.26192	down	uncharacterized protein
AT3G49940	0.000663862	-1.26032	down	LOB domain-containing protein 38
AT3G15760	0.00416226	-1.25922	down	uncharacterized protein
AT4G36670	0.00181181	-1.24863	down	putative polyol transporter 6
AT3G57640	0.000220543	-1.24092	down	protein kinase family protein
AT4G22470	0.00213619	-1.23798	down	protease inhibitor/seed storage/lipid transfer protein (LTP) family protein
AT2G37970	3.80662e-09	-1.22237	down	SOUL heme-binding-like protein
AT3G19010	3.88739e-08	-1.21538	down	2-oxoglutarate (2OG) and Fe(II)-dependent oxygenase superfamily protein
AT5G25910	0.000630634	-1.21287	down	receptor like protein 52
AT5G59730	0.00639545	-1.21233	down	exocyst subunit exo70 family protein H7
AT1G61370	0.00482458	-1.21146	down	S-locus lectin protein kinase family protein
AT3G50470	3.64347e-05	-1.20199	down	RPW8-like protein 3
AT5G13200	2.23002e-07	-1.19412	down	GRAM domain family protein
AT1G63860	1.06394e-05	-1.19151	down	TIR-NBS-LRR class disease resistance protein
AT1G51700	3.21743e-06	-1.18695	down	DOF zinc finger protein 1
AT4G31800	6.61825e-05	-1.18405	down	WRKY DNA-binding protein 18
AT4G01870	5.5187e-05	-1.18089	down	tolB-related protein
AT3G49790	0.000189697	-1.17798	down	Carbohydrate-binding protein
AT5G62570	4.15503e-08	-1.17293	down	calmodulin binding protein-like protein
AT3G19970	0.00011004	-1.16901	down	uncharacterized protein
AT5G13190	9.49662e-05	-1.16067	down	GSH-induced LITAF domain protein
AT1G62300	0.000185759	-1.15548	down	WRKY transcription factor 6
AT3G23150	1.70003e-05	-1.15395	down	ethylene receptor 2
AT3G26440	0.00765013	-1.15005	down	uncharacterized protein
AT5G19120	0.00154193	-1.14118	down	aspartyl protease family protein
AT2G16060	0.000807341	-1.14065	down	non-symbiotic hemoglobin 1
AT2G26560	0.000765729	-1.13968	down	phospholipase A 2A
AT5G21940	5.37972e-08	-1.13027	down	uncharacterized protein
AT1G74360	0.00028156	-1.12357	down	putative LRR receptor-like serine/threonine-protein kinase
AT2G39400	9.52363e-05	-1.1228	down	alpha/beta-Hydrolases superfamily protein
AT2G25250	0.000172954	-1.12224	down	uncharacterized protein
AT4G32020	5.74647e-08	-1.11985	down	uncharacterized protein
AT1G68840	8.64231e-08	-1.1168	down	AP2-EREBP family, RAVE subfamily protein RAV2
AT3G07195	6.00761e-05	-1.10861	down	RPM1-interacting protein 4 (RIN4) family protein
AT2G15390	2.15817e-07	-1.09485	down	probable fucosyltransferase 4
AT1G16130	0.00290938	-1.0918	down	wall-associated receptor kinase-like 2
AT5G08760	4.85983e-06	-1.08906	down	uncharacterized protein
AT3G16720	3.6876e-07	-1.08569	down	RING-H2 finger protein ATL2
AT1G65790	8.56108e-06	-1.08247	down	F1E22.15 [Arabidopsis thaliana]
AT4G19370	0.00266745	-1.0807	down	uncharacterized protein
AT4G31500	1.99756e-07	-1.07258	down	cytochrome P450 83B1
AT3G54200	0.00225215	-1.07122	down	late embryogenesis abundant hydroxyproline-rich glycoprotein
AT4G39640	0.0032769	-1.06583	down	gamma-glutamyl transpeptidase 1
AT5G13210	0.00409081	-1.06358	down	uncharacterized protein
AT3G05200	8.39535e-07	-1.05764	down	E3 ubiquitin-protein ligase ATL6
AT3G63380	9.12538e-07	-1.05288	down	putative calcium-transporting ATPase 12
AT2G15080	1.06788e-06	-1.04683	down	receptor like protein 19
AT3G50900	0.00160564	-1.04673	down	uncharacterized protein
AT1G24150	0.00683221	-1.04115	down	formin-like protein 4
AT2G38860	1.51348e-06	-1.03008	down	protease I (pfpI)-like protein YLS5
AT4G15800	3.67531e-05	-1.02587	down	protein ralf-like 33
AT2G41100	1.23537e-06	-1.02473	down	calmodulin-like protein 4
AT1G51790	1.06394e-05	-1.02193	down	leucine-rich repeat protein kinase-like protein
AT3G47090	0.000143956	-1.02103	down	leucine-rich repeat protein kinase-like protein
AT3G10300	1.10977e-05	-1.0169	down	putative calcium-binding protein CML49
AT2G31560	0.000334287	1.00676	up	uncharacterized protein
AT4G37925	2.66905e-05	1.01134	up	NAD(P)H-quinone oxidoreductase subunit M
AT2G44830	0.00301361	1.01213	up	protein kinase
AT1G78995	0.0030633	1.02486	up	uncharacterized protein
AT5G13730	8.15482e-05	1.06919	up	sigma factor 4
AT1G20160	0.00251289	1.077	up	Subtilisin-like serine endopeptidase family protein
AT1G33811	0.000193523	1.10483	up	GDSL esterase/lipase
AT3G05730	3.48493e-05	1.15745	up	defensin-like protein 205
AT3G47430	9.31394e-05	1.25361	up	peroxisomal membrane protein 11B
AT1G64780	0.000309018	1.27069	up	ammonium transporter 1;2
AT4G12320	1.51338e-09	1.31692	up	cytochrome P450, family 706, subfamily A, polypeptide 6
AT5G49330	0.00307649	1.38647	up	myb domain protein 111
AT3G19620	0.00942291	1.44287	up	putative beta-D-xylosidase 5
AT3G17360	0.00989668	1.48907	up	phragmoplast orienting kinesin 1
AT3G28270	9.42295e-07	1.63617	up	uncharacterized protein
AT1G58370	0.00190685	1.80032	up	xylanase 1
AT5G03260	0.00496933	1.88731	up	laccase 11
AT3G02310	0.0098253	2.90367	up	developmental protein SEPALLATA 2
AT4G14290	4.35176e-41	4.41679	up	alpha/beta-hydrolase family protein
AT1G27710	0.00266745	4.83545	up	Glycine-rich protein family
AT3G05170	9.83764e-16	#NAME?	down	phosphoglycerate mutase family protein
AT3G13710	3.5682e-07	#NAME?	down	prenylated RAB acceptor 1.F4
AT5G38700	0.00482458	#NAME?	down	uncharacterized protein
